# Supplementary material for: Integrin-linked kinase regulates the niche of quiescent epidermal stem cells
Source: PubMed Central journal article supplement (PMC4569844; doi:10.1038/ncomms9198), 2015-09-08
Supplement: ncomms9198-s1.pdf [file ncomms9198-s1.pdf]

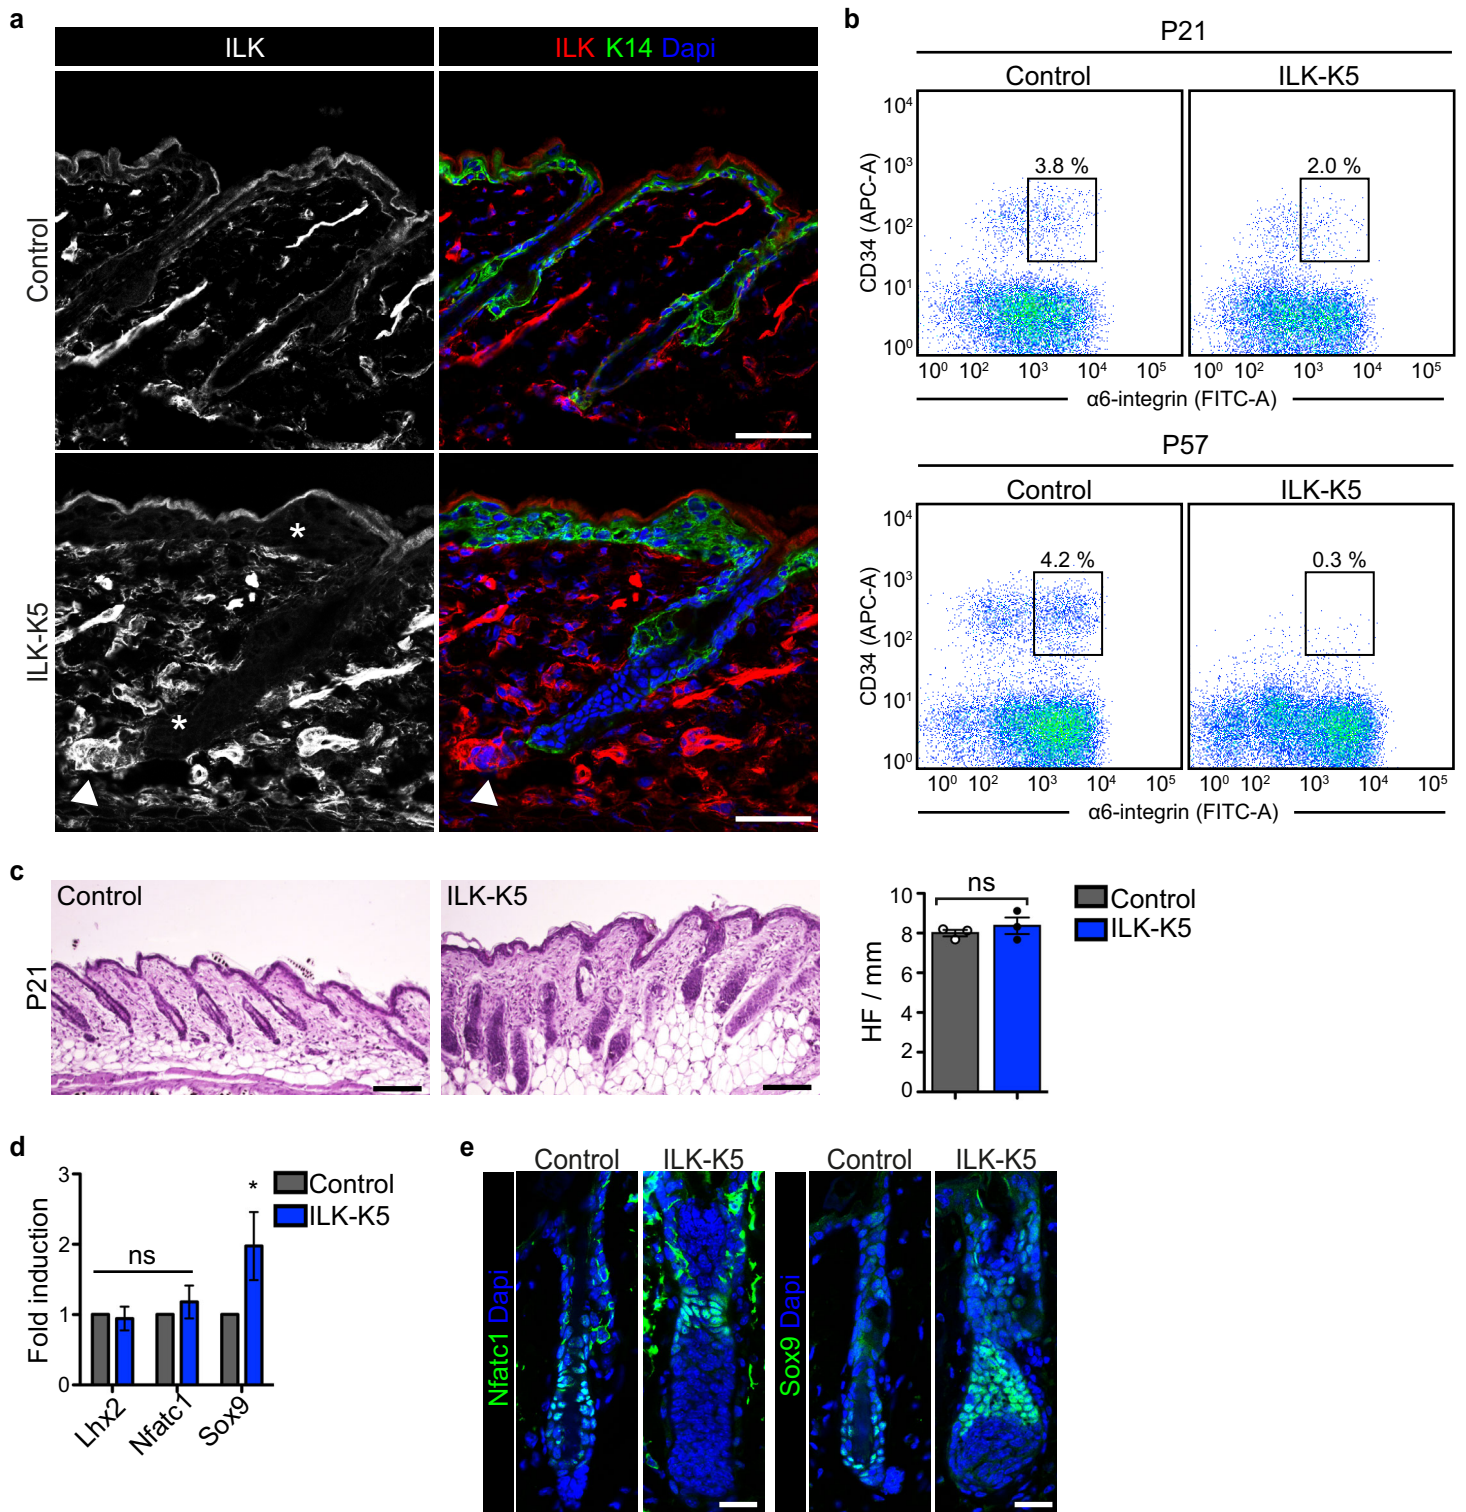

**Supplementary Figure 1. Analysis of stem cell (SC) number, hair follicle density and SC fate-determining factors in ILK-K5 mice**

**(a)** Immunofluorescence staining for ILK (red) and K14 (green). ILK staining is not detected in hair follicles (HF) and interfollicular epidermis (IFE) (asterisks) of ILK-K5 mice at P21, whereas the dermal papilla (DP) is positive for ILK (arrowhead). Scale bar 50  $\mu$ m.

**(b)** Representative plots of FACS analyses with antibodies against CD34 and  $\alpha$ 6 integrin from P21 and P57 epidermis. ILK-K5 mice show reduced amounts of CD34<sup>+</sup>/ $\alpha$ 6<sup>hi</sup> HFSCs.

**(c)** Hematoxylin/eosin staining of P21 skin (scale bars 100  $\mu$ m). No difference in HF density between control and ILK-K5 mice is observed (mean  $\pm$  SEM; n=3; ns=not significant, p=0.70, Mann-Whitney).

**(d)** RT-qPCR analysis of key transcription factors required to establish bulge SC fate. No significant difference is observed in expression of Lhx2 or Nfatc1. Sox9 expression is slightly increased (mean  $\pm$  SEM; n=4; ns=not significant, p>0.2817; \*p=0.0211, Mann-Whitney).

**(e)** Immunofluorescence staining for Nfatc1 (left) and Sox9 (right) at P21. Scale bar 25  $\mu$ m.

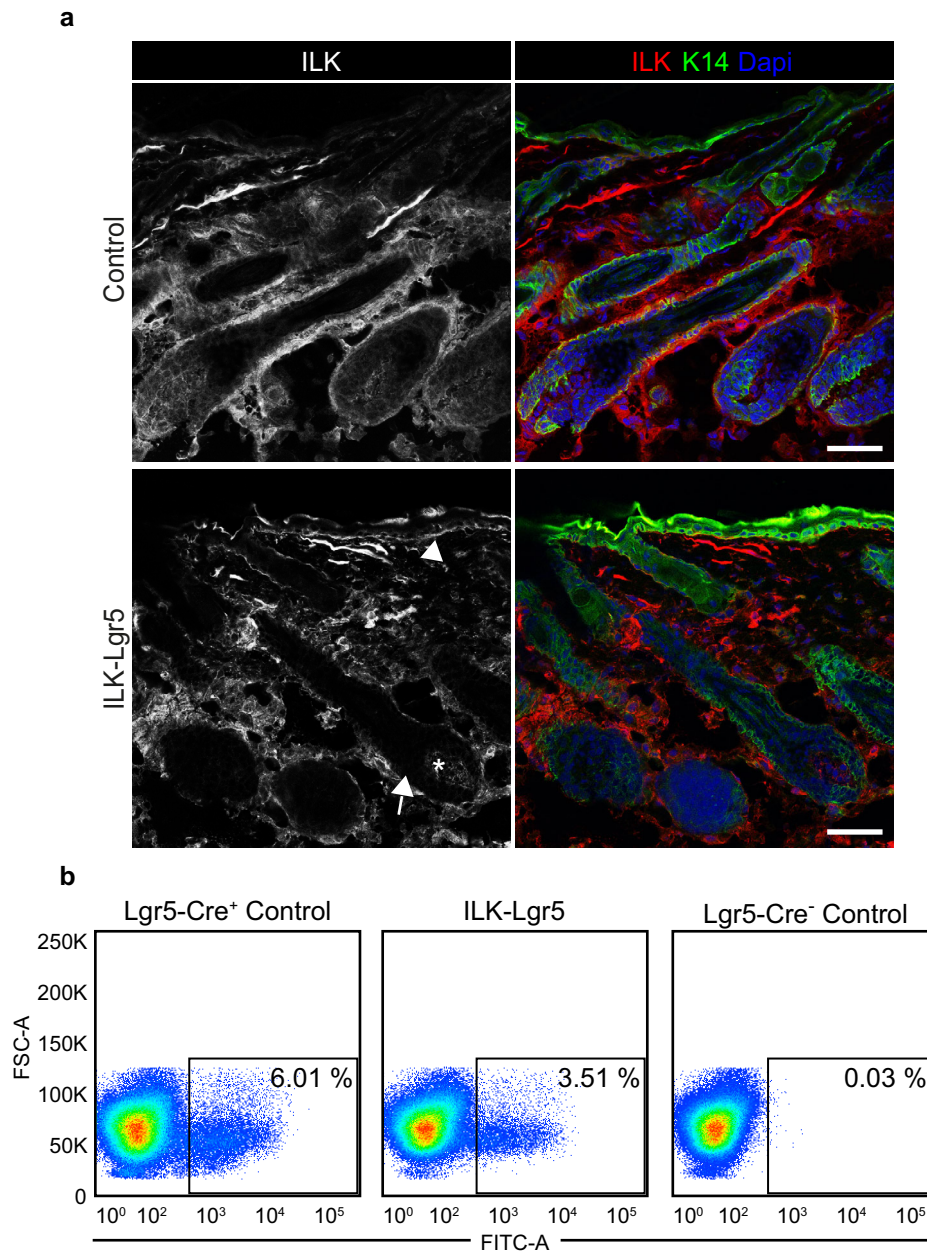

**Supplementary Figure 2. Analysis of ILK expression and Lgr5-EGFP cells in ILK-Lgr5 mice**

(a) Immunofluorescence staining for ILK (red) and K14 (green). ILK staining is not detected in HF of ILK-Lgr5 mice (arrows), whereas the IFE (arrowhead) and DP (asterisk) show comparable staining to control mice. Scale bars 50  $\mu$ m.

(b) Representative FACS plots for quantification of Lgr5-EGFP cells. ILK-Lgr5 mice show reduced amounts of EGFP-positive cells.

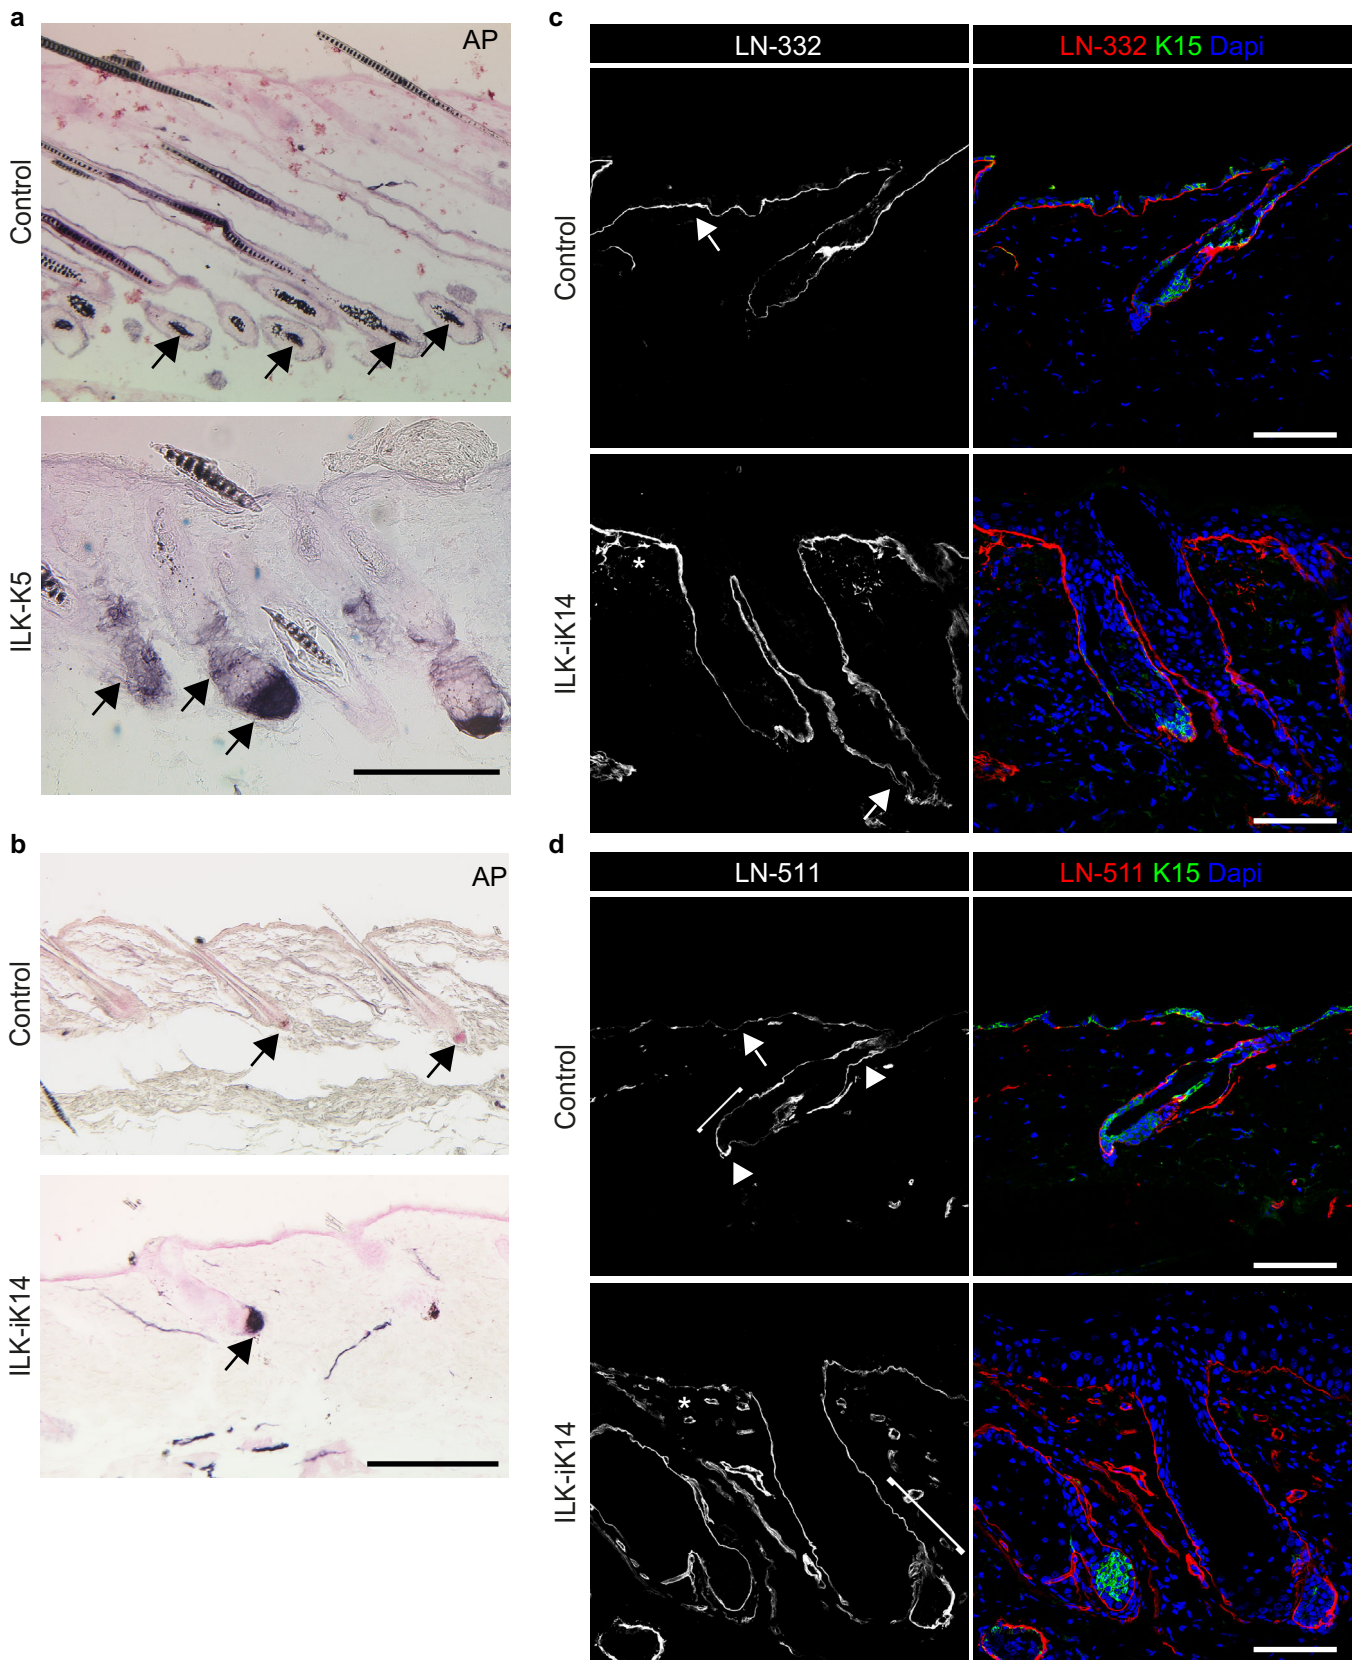

**Supplementary Figure 3. Analysis of DP and BM in ILK-K5 and ILK-iK14 mice**

**(a)** Alkaline phosphatase (AP) staining to detect DP cells in ILK-K5 skin during anagen (P14). In control skin the DP is encapsulated by the HF (arrows; upper panel), whereas in ILK-K5 skin AP-positive cell population is increased and surrounds the base of the HF (arrows; lower panel). Scale bars 200  $\mu$ m. **(b)** AP staining to detect DP cells in ILK-iK14 skin after 8 months of doxycycline. In control skin the DP is attached to the base of telogen HF (arrows; upper panel), whereas in ILK-iK14 skin the AP-positive cell population is increased and encapsulates the base of the HF (arrows; lower panel). Scale bars 200  $\mu$ m. **(c)** Immunofluorescence staining for LN-332 (red) and K15 (green). LN-332 staining shows higher intensity beneath the IFE (arrow) than around HF in control skin (upper panel). Note fragmentation of LN-332-stained BM in the IFE (asterisk) and tips of HF (arrow) in ILK-iK14 skin (lower panel). Scale bars 50  $\mu$ m. **(d)** Immunofluorescence staining for LN-511 (red) and K15 (green). LN-511 staining shows highest intensity at the isthmus region and around HG (arrowheads). Only faint staining is observed beneath the IFE (arrow) and around bulge (bracket) in control skin (upper panel). Note fragmentation of LN-511-stained BM in the IFE (asterisk) and high intensity around bulge and HG (brackets) in ILK-iK14 skin (lower panel). Scale bars 50  $\mu$ m.

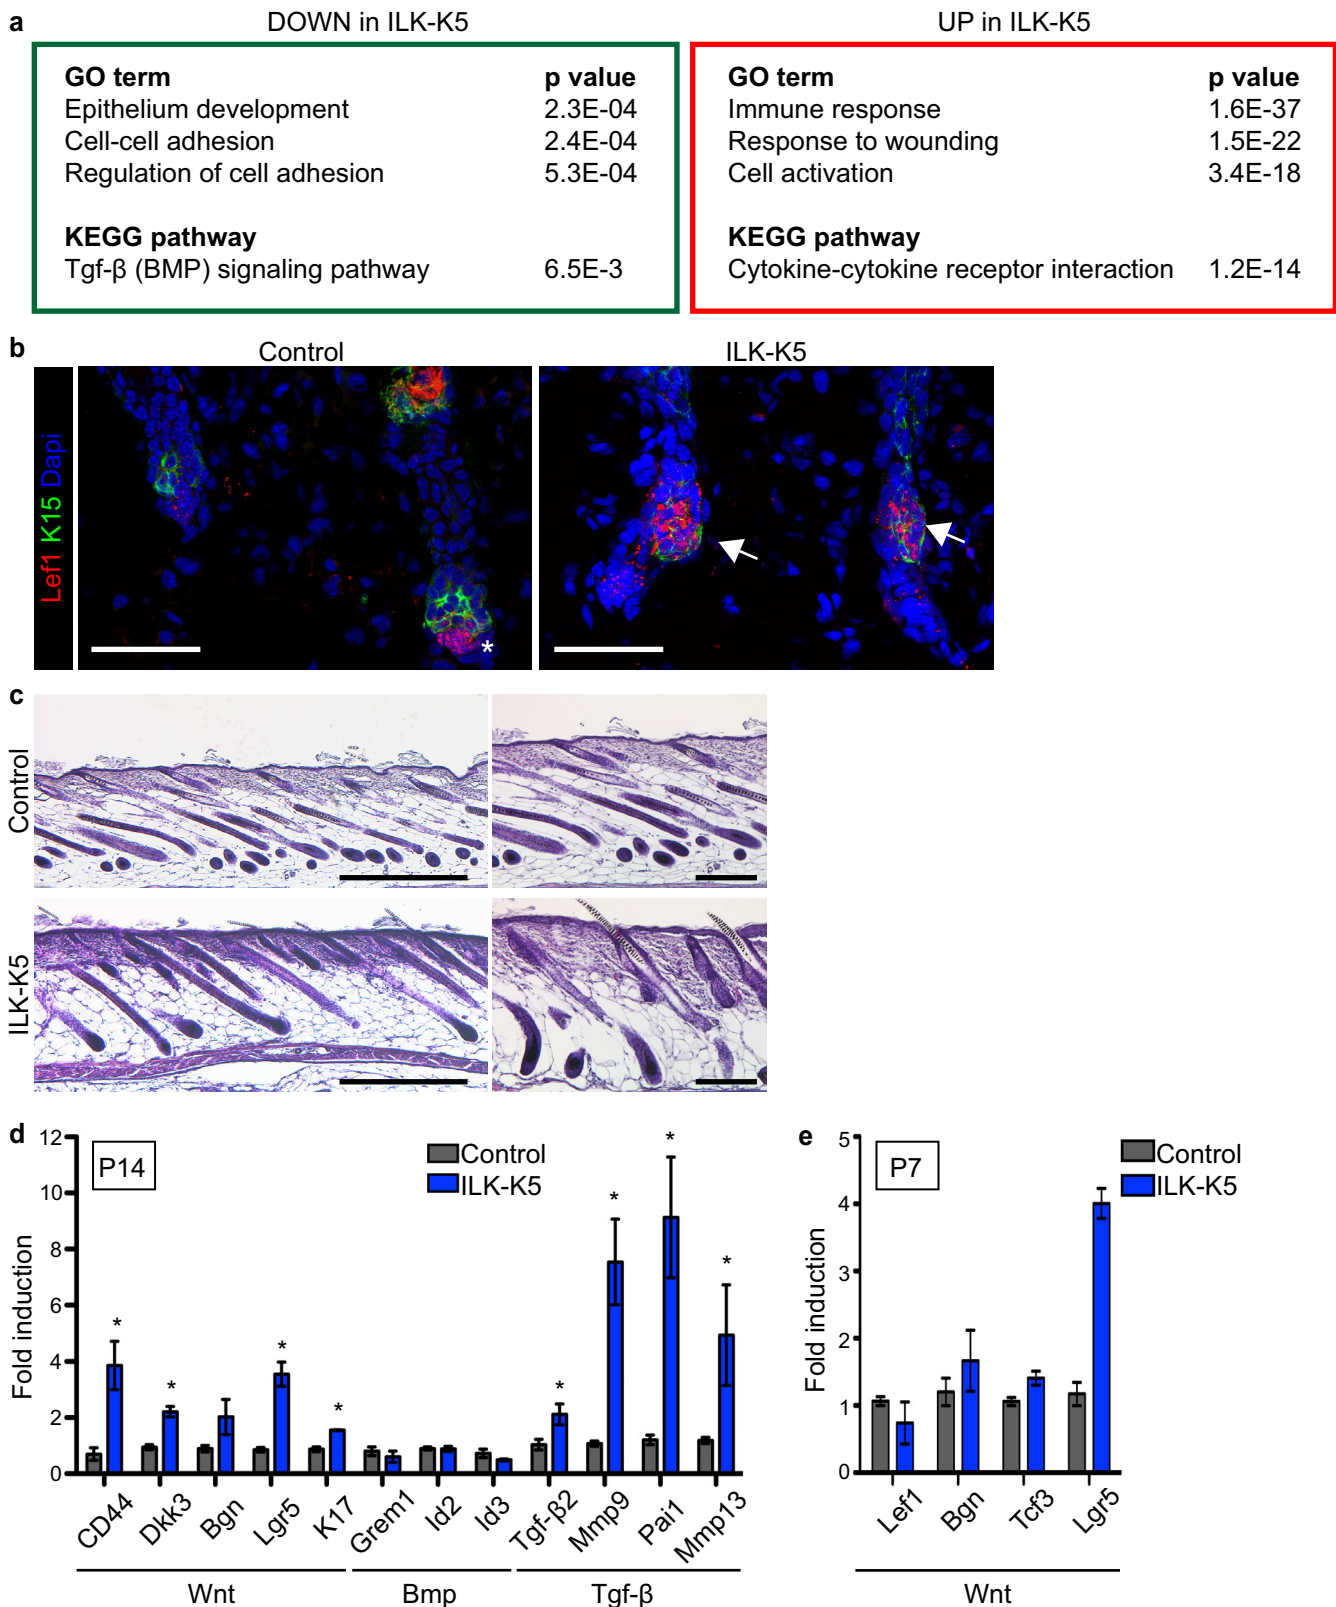

**Supplementary Figure 4. Analysis of HFSC activation status in ILK-K5 mice**

(a) Summary of GO term and KEGG pathway analyses from RNA-seq data of FACS sorted bulge SCs.

(b) Lef1 staining (red) from P21 control and ILK-K5 skin. Controls show staining in the DP only (asterisk), whereas in ILK-K5 mice also K15-positive cells (green) show staining for Lef1. Scale bar 50  $\mu$ m.

(c) Hematoxylin/eosin staining of P14 skin. Both control and ILK-K5 HF display anagen morphology. Scale bars 500  $\mu$ m/left panel; 100  $\mu$ m/right panel.

(d) RT-qPCR analysis shows upregulation of Wnt and Tgf- $\beta$  pathway target genes, but no change in Bmp pathway target genes in sorted EPCs from P14 ILK-K5 skin (mean  $\pm$  SEM; n=3; \*p<0.05, Mann-Whitney).

(e) RT-qPCR analysis of Wnt target gene expression from P7 EPCs (mean  $\pm$  SEM; n=4; p>0.0765, Mann-Whitney).

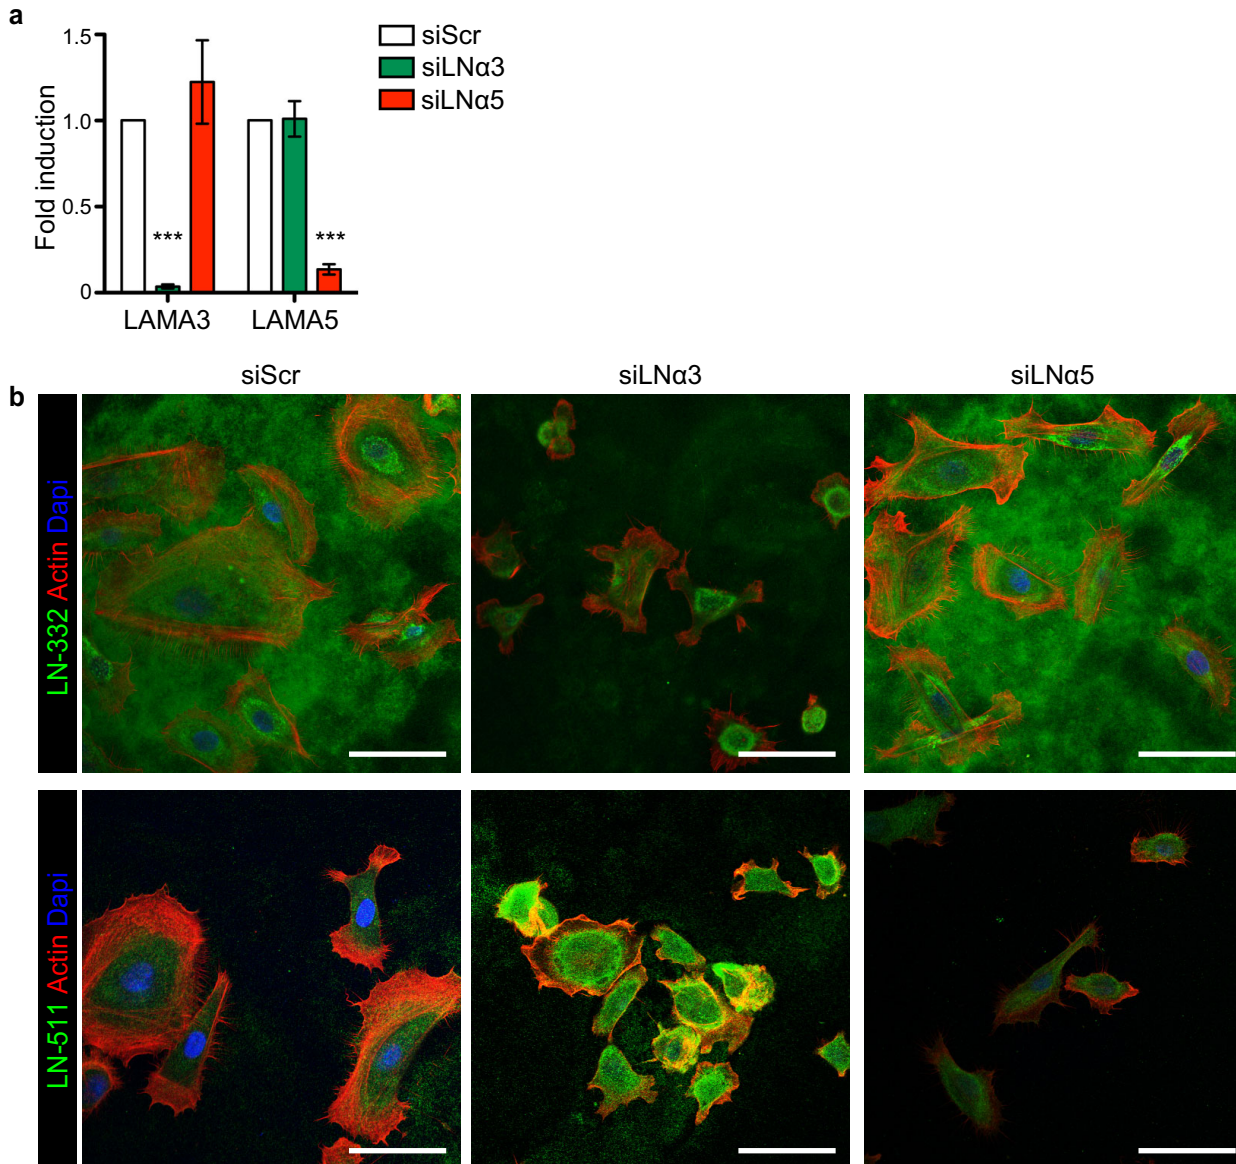

**Supplementary Figure 5. Analysis of LN expression and deposition in keratinocytes transfected with LN $\alpha$ 3 or  $\alpha$ 5 siRNA**

**(a)** RT-qPCR analysis of LN $\alpha$ 3 and LN $\alpha$ 5 in cells transfected with scrambled (siScr), LN $\alpha$ 3, or LN $\alpha$ 5 siRNA. Note efficient and specific depletion of the respective LN $\alpha$ -chain upon siRNA transfection (mean  $\pm$ SEM; n=4, \*\*\*p<0.001, 2-Way ANOVA).

**(b)** Immunofluorescence staining for actin (red) and LN-332 or LN-511 (both in green). Depletion of LN $\alpha$ 3 leads to reduced deposition of LN-332, whereas depletion of LN $\alpha$ 5 has no effect on LN-332 deposition (upper panel). Cells transfected with siScr deposit very little LN-511 (lower panel). Depletion of LN $\alpha$ 5 leads to reduced deposition of LN-511. In addition, depletion of LN $\alpha$ 3 leads to a slight increase in LN-511 deposition (lower panel). Scale bars 50  $\mu$ m.

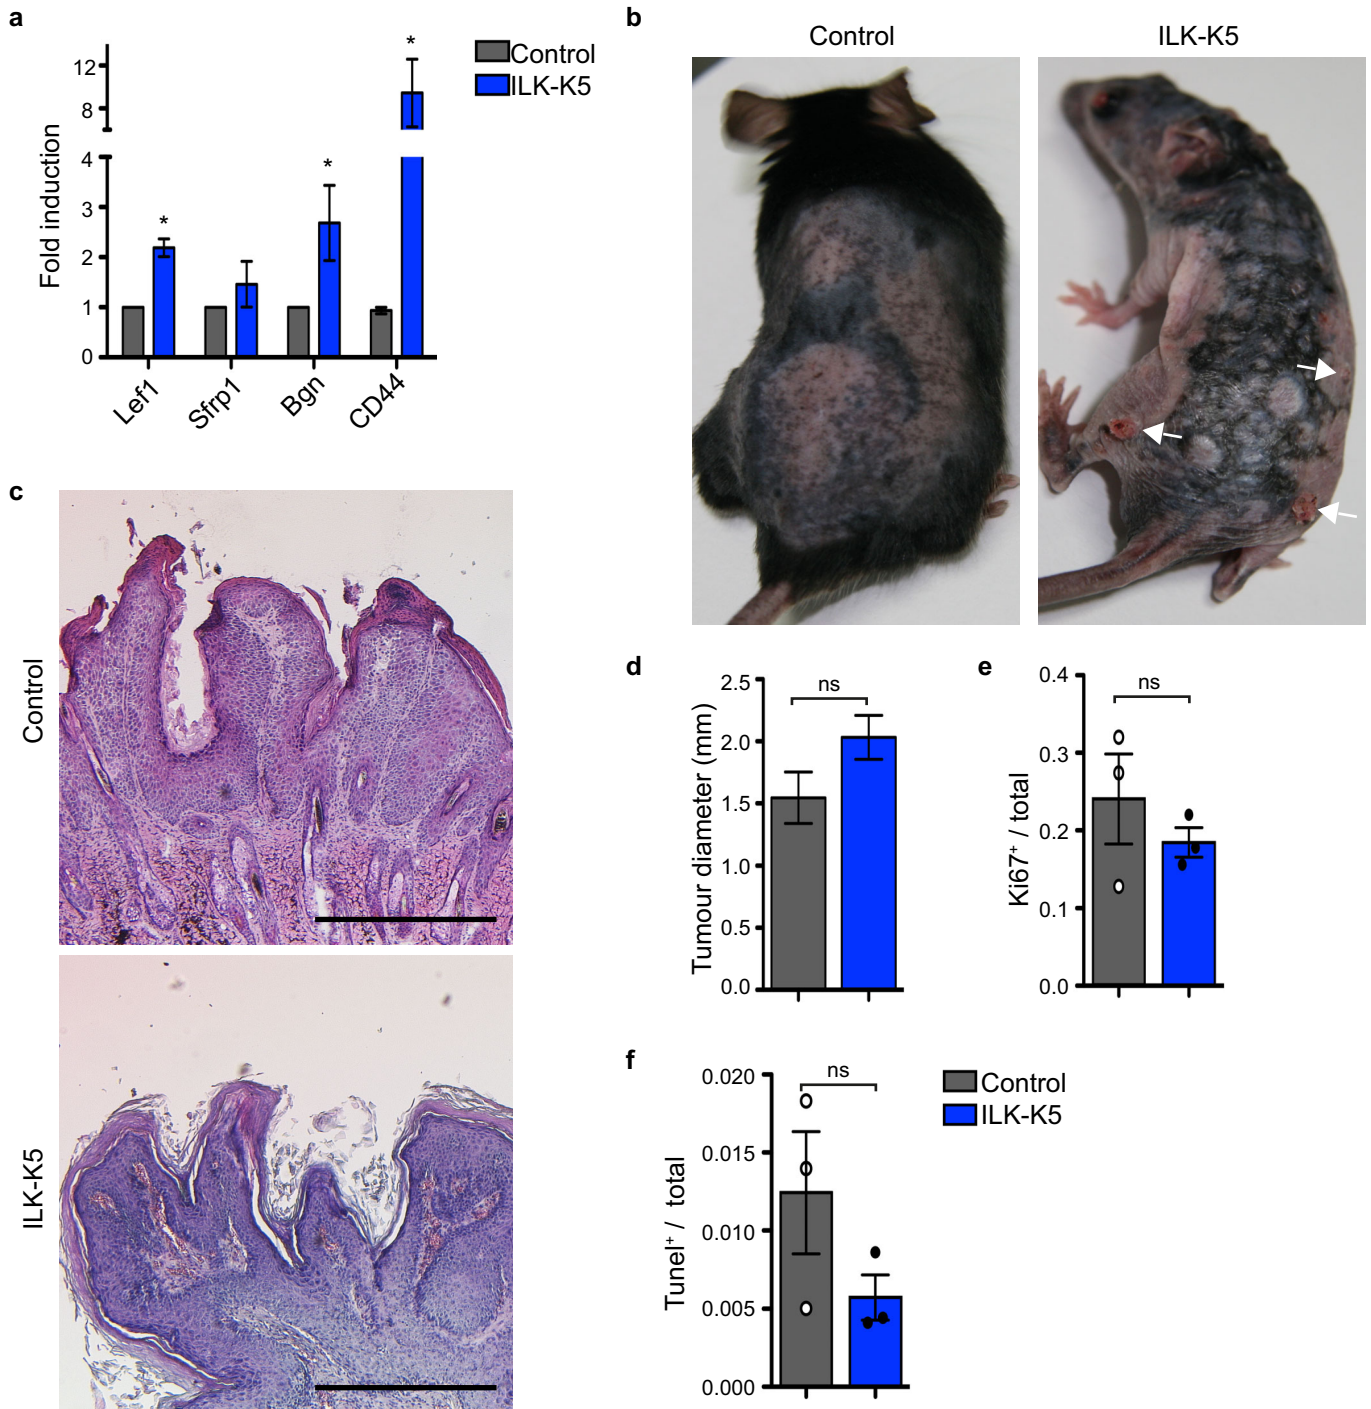

**Supplementary Figure 6. Analysis of Wnt target gene expression and tumour development in ILK-K5 mice**

**(a)** RT-qPCR analysis shows upregulation of Wnt target gene expression in sorted EPCs from P57 ILK-K5 skin (mean  $\pm$  SEM; n=4; \*p=0.0211, Mann-Whitney).

**(b)** Representative images of mice treated twice with DMBA followed by 18 weeks of TPA. All ILK-K5 mice had developed papillomas (arrows) at this point.

**(c)** Hematoxylin/eosin stainings of papillomas from control and ILK-K5 mice show comparable histology. Scale bars 500  $\mu$ m.

**(d)** Quantification of tumour diameter shows no significant difference in tumour sizes from control and ILK-K5 mice (mean  $\pm$  SEM; n=11/31; ns=not significant, p=0.1386, Student's t-test).

**(e)** Quantification of proliferation within tumours using the marker Ki67 shows no significant difference in proliferation between control and ILK-K5 tumours (mean  $\pm$  SEM; n=3; ns=not significant, p=0.70, Mann-Whitney).

**(f)** Quantification of apoptosis within tumours using TUNEL staining shows no significant difference in tumour cell apoptosis in control and ILK-K5 mice (mean  $\pm$  SEM; n=3; p=0.344, Mann-Whitney).

Supplementary Figure 7. Full scans of Western blots in this study

Fig. 4c

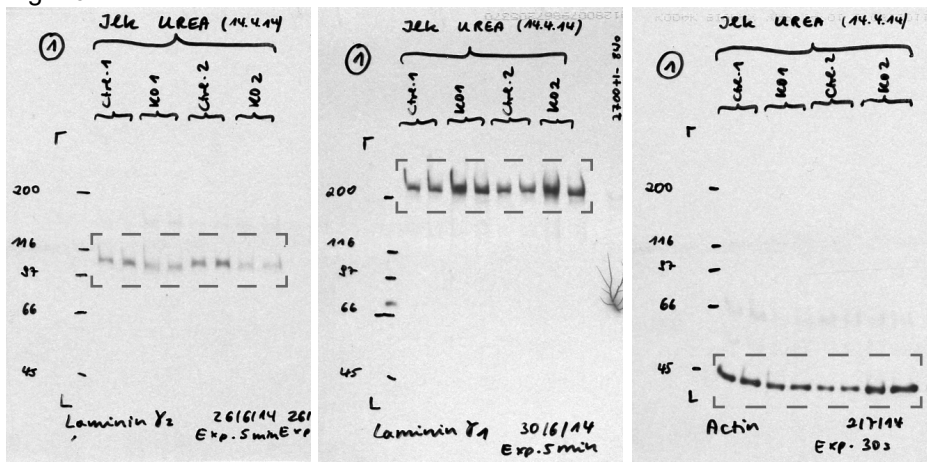

Fig. 5f

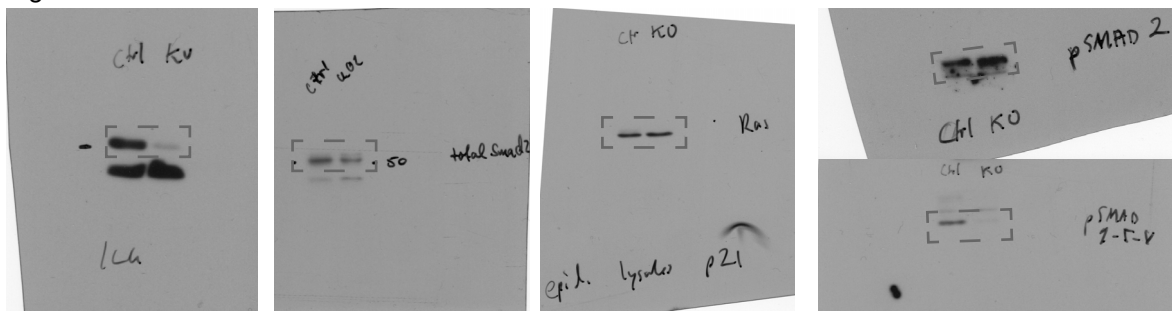

Fig. 6a

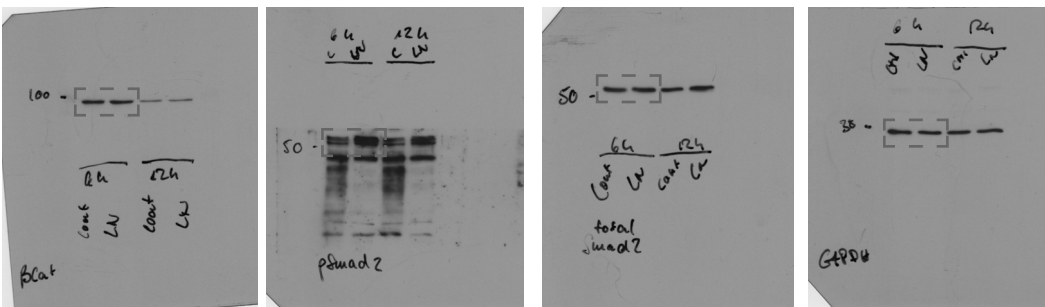

Fig. 6c

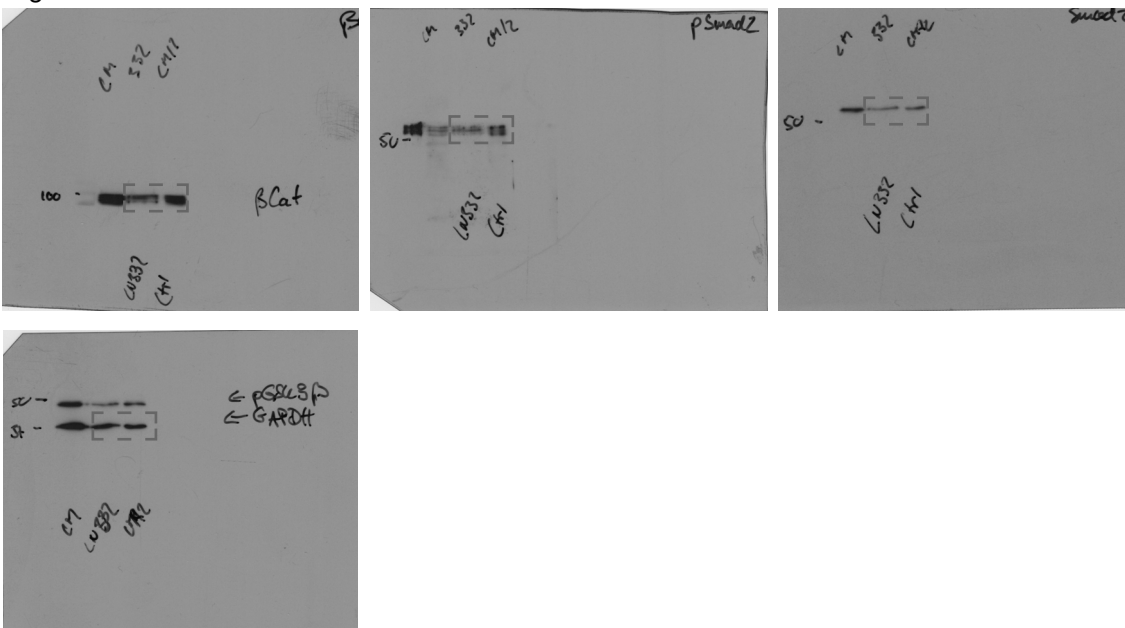

**Supplementary Table 1** Primer sequences used for qRT-PCR

| Gene/oligo  | Sequence 5' – 3'           | Amplicon length (bp) |
|-------------|----------------------------|----------------------|
| mβAct fw    | TCAAGATCATTGCTC            | 106                  |
| mβAct rev   | TACTTCTGCTTGCTGATCCAC      |                      |
| mAxin2 fw   | AGCGCCAACGACAGCGAGTT       | 188                  |
| mAxin2 rev  | AGGCGGTGGGTCTCTCGAAA       |                      |
| mBambi fw   | CTTTGGAATGCTGTCACGAA       | 149                  |
| mBambi rev  | GGAAGTCAGCTCCTGCATCT       |                      |
| mBgn fw     | TCCGCACTCCAACAACATCA       | 204                  |
| mBgn rev    | GGCAACCACTGCCTCTACTT       |                      |
| mCD44 fw    | AGCCCCTCCTGAAGAAGACT       | 116                  |
| mCD44 rev   | ACTCGCCCTTCTTGCTGTAG       |                      |
| mDkk3 fw    | ATGCTATGCACCCGAGACAG       | 159                  |
| mDkk3 rev   | GAACAGCAGGCCTCTTTGGA       |                      |
| mGAPDH fw   | GGTGTGAACGGATTTGGCCGTATTG  | 155                  |
| mGAPDH rev  | CCGTTGAATTTGCCGTGAGTGGAGT  |                      |
| mGrem1 fw   | CCACGGAAGTGACAGAATGA       | 141                  |
| mGrem1 rev  | TTGTGCTGAGCCTTGTCAGG       |                      |
| mId2 fw     | ATCCCCCAGAACAAGAAGGT       | 128                  |
| mId2 rev    | TGTCCAGGTCTCTGGTGATG       |                      |
| mId3 fw     | GCATGGATGAGCTTCGATCT       | 126                  |
| mId3 rev    | ACCAGCGTGTGCTAGCTCTT       |                      |
| mK17 fw     | GAGAGGATGCCACCTGACT        | 138                  |
| mK17 rev    | GTCCTTAACGGGTGGTCTGG       |                      |
| hLAMA3 fw   | AGTTCACAGCAGCAAAGGGT       | 211                  |
| hLAMA3 rev  | GCTGACAGTTAACACATATGCCTG   |                      |
| hLAMA5 fw   | CTTCGTCTTCTACGTCGGGG       | 109                  |
| hLAMA5 rev  | CACCTCCTCATTGAGCGTGT       |                      |
| mLef1 fw    | CGGAACTCTGCGCCACCGAT       | 177                  |
| mLef1 rev   | TGACCACCTCATGCCCGTTGC      |                      |
| mLhx2 fw    | CCTACTACAACGGCGTGGGCACTGT  | 137                  |
| mLhx2 rev   | GTCACGATCCAGGTGTTGAGCATCG  |                      |
| mLgr5 fw    | CCAATGGAATAAAGACGACGGCAACA | 128                  |
| mLgr5 rev   | GGGCCTTCAGGTCTTCCTCAAAGTCA |                      |
| mMmp9 fw    | TGAGCTGGACAGCCAGACACTAAA   | 148                  |
| mMmp9 rev   | TCGCGGCAAGTCTTCAGAGTAGTT   |                      |
| mMmp13 fw   | TGTTTGCAGAGCACTACTTGAA     | 132                  |
| mMmp13 rev  | CAGTCACCTCTAAGCCAAAGAAA    |                      |
| mNfatc1 fw  | GGTGCTGTCTGGCCATAACT       | 128                  |
| mNfatc1 rev | CCAGGGAATTTGGCTTGAC        |                      |
| mPai1 fw    | GACACCCTCAGCATGTTTCATC     | 218                  |
| mPai1 rev   | AGGGTTGCACTAAACATGTCAG     |                      |
| mS18 fw     | GATCCCAGACTGGTTCCTGA       | 79                   |
| mS18 rev    | GTCTAGACCGTTGGCCAGAA       |                      |
| hS26 fw     | GCGAGCGTCTTCGATGCCTATGT    | 128                  |
| hS26 rev    | GGGGGTGTTGCGTTCCTTGCG      |                      |



|            |                            |     |
|------------|----------------------------|-----|
| mS26 fw    | CGTCTTCGACGCCTACGTGCT      | 180 |
| mS26 rev   | CGGCCTCTTTACATGGGCTTTGGT   |     |
| mSfrp1 fw  | GCAAGCGAGTTTGCCTGAGGATGA   | 101 |
| mSfrp1 rev | GGCCCCAGCTTCAAGGGTTTCTTCT  |     |
| mTcf3 fw   | CTCAGCAGCAAATCCAAGAGGCAGAG | 109 |
| mTcf3 rev  | TGGGAAGACGCAGGGCTATCACAAG  |     |
| mTgfb2 fw  | GAACCCAAAGGGTACAATGC       | 100 |
| mTgfb2 rev | TGGTGTGTACAGGCTGAGG        |     |
